# Supplementary material for: Cultural Activation of Consumers
Source: Atypon-hosted journal article supplement (doi:10.1176/appi.ps.201500278), 2015-10-15
Supplement: appi.ps.201500278.ds001.pdf [file appi.ps.201500278.ds001.pdf]

Table: Cultural Activation Prompts (CAPs) for Consumers  
 Prompts to start a cultural conversation with your care givers. Tell them:

|                                                                                                                                                                                         |
|-----------------------------------------------------------------------------------------------------------------------------------------------------------------------------------------|
| 1. What you would like to be called                                                                                                                                                     |
| 2. The kind of person you would like to receive care from. <i>Even though the person you may be seeing for your care is not your first choice, it is still good to talk about this.</i> |
| 3. The different cultural groups you identify with because you share some of their important values and world views... <i>this is your cultural identity</i>                            |
| 4. Any negative or traumatic experiences you have had related to your cultural identity                                                                                                 |
| 5. The names given by persons in the groups you culturally identify with for why you are seeking care, <i>even the ones that may be hurtful</i>                                         |
| 6. What persons from the groups you culturally identify with think may be the cause(s) of your seeking care                                                                             |
| 7. Why you think you need care                                                                                                                                                          |
| 8. What attitudes persons from the groups you culturally identify with have about your seeking care                                                                                     |
| 9. What supports might be given to you from persons from the groups you culturally identify with while you are receiving care                                                           |
| 10. What stresses might be placed on you by persons from the groups you culturally identify with when you are receiving care                                                            |
| 11. Who from the groups you culturally identify with might help you while you are in care                                                                                               |
| 12. Kinds of different care or alternative practices that you have had that have been helpful                                                                                           |
| 13. Care that you have had that was not helpful                                                                                                                                         |
| 14. Things you like to do with groups you culturally identify with where you live, worship, shop, socialize, etc.                                                                       |
| 15. What indicates to persons from the groups you culturally identify with that you are in recovery                                                                                     |
